# Supplementary material
Source: ML conference proceedings conference paper supplement (https://openreview.net/forum?id=jQy8qzLTDG)
Supplement: supplementary_material [file attachment]

## 702 A DERIVATION, DATASETS, AND SETTING

### 703 A.1 MATHEMATICAL DERIVATION

704 **Proof of Eq. 2.** We provide the derivation for the closed-form solution of Eq. 1. The objective can  
705 be rewritten as:

$$706 \mathcal{L}(\mathbf{W}) = \|\mathbf{W}\mathbf{X} - \mathbf{W}_o\mathbf{Y}\|_F^2 + \|\mathbf{W} - \mathbf{W}_o\|_F^2. \quad (7)$$

707 Taking the derivative of  $\mathcal{L}(\mathbf{W})$  with respect to  $\mathbf{W}$  and setting it to zero:

$$708 \frac{\partial \mathcal{L}}{\partial \mathbf{W}} = 2(\mathbf{W}\mathbf{X} - \mathbf{W}_o\mathbf{Y})\mathbf{X}^\top + 2(\mathbf{W} - \mathbf{W}_o) = 0. \quad (8)$$

709 Solving the above equation gives:

$$710 \mathbf{W}(\mathbf{X}\mathbf{X}^\top + \mathbf{I}) = \mathbf{W}_o(\mathbf{Y}\mathbf{X}^\top + \mathbf{I}), \quad (9)$$

$$711 \Rightarrow \mathbf{W}^* = (\mathbf{W}_o\mathbf{Y}\mathbf{X}^\top + \mathbf{W}_o) (\mathbf{X}\mathbf{X}^\top + \mathbf{I})^{-1}. \quad (10)$$

712 **Proof of Eq. 6.** We construct the Lagrangian:

$$713 \mathcal{L}(\mathbf{W}, \Lambda) = \|\mathbf{W} - \mathbf{W}_o\|_F^2 + \text{Tr} \left[ \Lambda^\top (\mathbf{W}\mathbf{X} - \mathbf{W}_o\mathbf{Y}) \right], \quad (11)$$

714 and take the derivative with respect to  $\mathbf{W}$ :

$$715 \frac{\partial \mathcal{L}}{\partial \mathbf{W}} = 2(\mathbf{W} - \mathbf{W}_o) + \Lambda\mathbf{X}^\top = 0, \quad (12)$$

716 which leads to:

$$717 \mathbf{W} = \mathbf{W}_o - \frac{1}{2}\Lambda\mathbf{X}^\top. \quad (13)$$

718 Substitute this back into the constraint  $\mathbf{W}\mathbf{X} = \mathbf{W}_o\mathbf{Y}$ :

$$719 (\mathbf{W}_o - \frac{1}{2}\Lambda\mathbf{X}^\top)\mathbf{X} = \mathbf{W}_o\mathbf{Y}, \quad (14)$$

$$720 \Rightarrow \Lambda = 2(\mathbf{W}_o\mathbf{X} - \mathbf{W}_o\mathbf{Y})(\mathbf{X}^\top\mathbf{X})^{-1}. \quad (15)$$

721 Finally, plugging  $\Lambda$  back yields the closed-form solution:

$$722 \mathbf{W}^* = \mathbf{W}_o + (\mathbf{W}_o\mathbf{Y} - \mathbf{W}_o\mathbf{X})(\mathbf{X}^\top\mathbf{X})^{-1}\mathbf{X}^\top. \quad (16)$$

723 The above derivation holds under the assumption that  $\mathbf{X}$  is column full rank, ensuring that  $\mathbf{X}^\top\mathbf{X}$   
724 is invertible. If  $\mathbf{X}$  is not column full rank, the solution can be obtained using the Moore-Penrose  
725 pseudoinverse.

726 **Proof of the non-zero property of Eq. 3.** We aim to show that Eq. 3 is non-zero in general, *i.e.*, for  
727 almost all  $\mathbf{X} \neq \mathbf{Y}$ . Let us denote the inner term by:

$$728 \Delta = (\mathbf{Y}\mathbf{X}^\top + \mathbf{I})(\mathbf{X}\mathbf{X}^\top + \mathbf{I})^{-1}\mathbf{X} - \mathbf{Y}.$$

729 If  $\mathbf{X} \neq \mathbf{Y}$ , then  $\Delta \neq \mathbf{0}$  in almost all cases (except for rare degenerate cases), because:

- 730 • When  $\mathbf{X} = \mathbf{Y}$ , it is easy to verify that  $\Delta = \mathbf{0}$ , making Eq. 3 equal to zero.
- 731 • However, for  $\mathbf{X} \neq \mathbf{Y}$ ,  $\Delta = \mathbf{0}$  implies a highly specific algebraic constraint between  $\mathbf{X}$  and  
732  $\mathbf{Y}$ :

$$733 (\mathbf{Y}\mathbf{X}^\top + \mathbf{I})(\mathbf{X}\mathbf{X}^\top + \mathbf{I})^{-1}\mathbf{X} = \mathbf{Y}.$$

734 This is a matrix equation with strict structural requirements, which generically does not  
735 hold for nearly randomly features  $\mathbf{X}$  and  $\mathbf{Y}$ .

### 736 A.2 DETAILED EXPERIMENTAL SETTING

737 **Study of parameter deviations.** To facilitate the study, we manually set the parameter deviation  
738  $\Delta$  as the identity matrix  $\mathbf{I}$  scaled by the Frobenius norm of the pretrained parameter  $\mathbf{W}$ , *i.e.*,  
739  $\Delta = \alpha\|\mathbf{W}\|_F \cdot \mathbf{I}$ , where  $\alpha$  is a global scaling factor. Using this consistent scaling, we examined  
740 how applying identical parameter deviations to shallow versus deep layers affects the generative  
741 capabilities of the model.

---

**Algorithm 2:** Our algorithm (ErasePro-modified)

---

**Input:** Prompt input  $\mathbf{X}^0, \mathbf{Y}^0$ ; Layer number  $S$ ; Pretrained weights across all layers  $\{\mathbf{W}_o^i\}_{i=1}^S$   
**Output:** Updated model  
 $\{\mathbf{Y}^i\}_{i=1}^S \leftarrow \text{Extract-Anchor-Features}(\text{Model}, \mathbf{Y}^0)$ ;  
**for**  $i = 1, \dots, S$  **do**  
     $\mathbf{W}^* \leftarrow \mathbf{W}_o^i + (\mathbf{W}_o^i \mathbf{Y}^{i-1} - \mathbf{W}_o^i \mathbf{X}^{i-1})((\mathbf{X}^{i-1})^\top \mathbf{X}^{i-1})^{-1}(\mathbf{X}^{i-1})^\top$ ; // Eq. 5  
     $\mathbf{X}^i \leftarrow \text{Layer}^i(\mathbf{X}^{i-1})$ ;  
    Model  $\leftarrow \text{Update}(\text{Model}, \text{Layer}^i)$ ;  
**return** Model;

---

In our experiments, we adopted stable diffusion (Rombach et al., 2022) as the base model. For the shallow-layer setting, we injected parameter deviations into the QKV projections of the first self-attention (Vaswani et al., 2017) block in the text encoder. For the deep-layer setting, we applied the same deviations to all QKV projections in a cross-attention block within the U-Net.

In the main text, we present results with  $\alpha = 0.2$ . Under this setting, the same magnitude of parameter deviations causes significantly greater damage when applied to deeper layers: the model fails to generate valid outputs, while shallow-layer perturbation results in only mild degradation. This highlights the greater sensitivity of deeper layers to parameter modification. We show more results in Figure 7

**Datasets.** 1) The *Inappropriate Image Prompts (I2P)* dataset (Schramowski et al., 2023) is a benchmark designed to evaluate the tendency of text-to-image diffusion models to generate inappropriate content. It contains real-world user prompts that are disproportionately likely to produce harmful or sensitive imagery, including hate, harassment, violence, self-harm, sexual content, shocking visuals, and illegal activities. The notion of “inappropriateness” is grounded in a subjective but socially aware definition, referring to content that may cause offense, anxiety, or distress. Prompts were collected based on CLIP-space similarity from a large-scale archive of user-generated prompts and images. The dataset includes image generation metadata and annotations estimating the likelihood of inappropriate outputs, allowing for robust evaluation of safety interventions in generative models. 2) In erasure tasks, where the target concepts “explicitly” appear in the prompt, the generation for each concept was conditioned on 10 prompts. All prompts were generated using GPT-4o (Hurst et al., 2024) to ensure they are well-suited for T2I models. For instance, for the target concept *naked*, GPT-4o produced descriptive and stylized prompts such as “a naked figure in a classical painting”. It should be noted that the generated dataset does not contain any images, as our method only requires the use of text features.

**Inference Setting.** We adopted stable diffusion v1.4 as the base model. During inference, we used the following configuration: 50 inference steps, a guidance scale of 7.5, and an image resolution of 512x512. To ensure fair comparison across all baselines, a fixed random seed was used.

**Training Setting of ErasePro.** For erasure tasks where the target concepts appear explicitly in the prompt, we employed the main algorithm. Concept features are constructed by concatenating the token embeddings corresponding to the prompt. The intervention spans from the first layer of the text encoder to the cross-attention layers of the U-Net. ErasePro modifies the QKV projections of the self-attention layers in the text encoder, as well as the KV projections associated with the textual

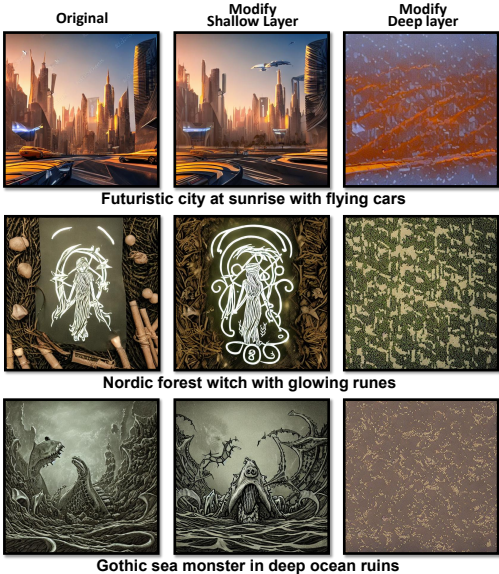

Figure 7: Comparison of Shallow vs. Deep Layer Parameter Deviations.

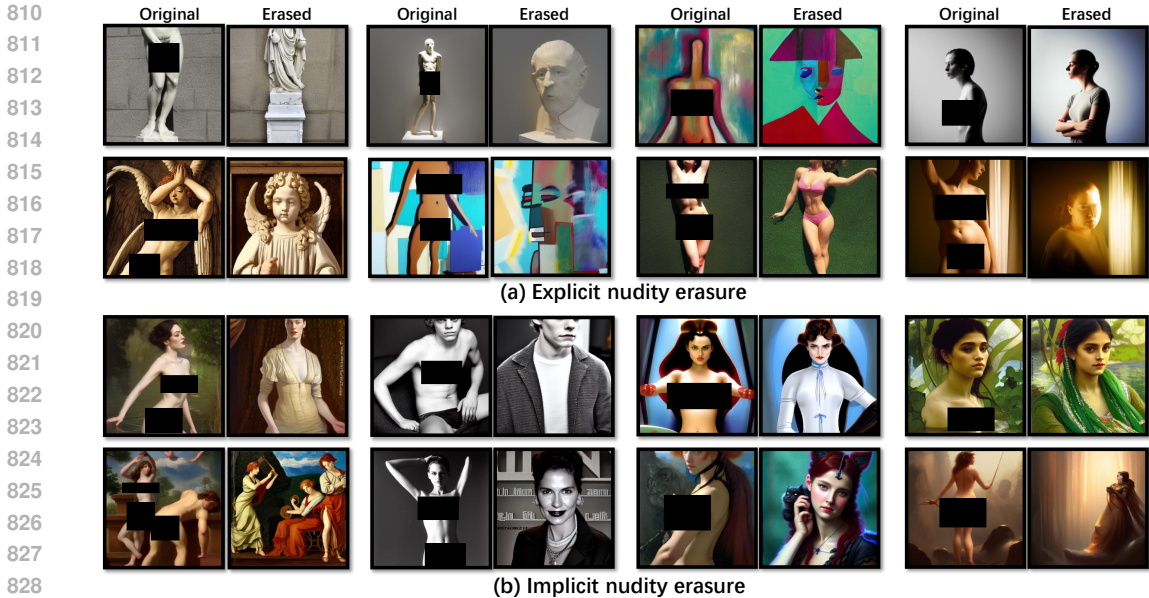

Figure 8: (a) More qualitative results for explicit nudity erasure. (b) More qualitative results for implicit nudity erasure.

|               | Butt. | F-Br. | F-Gen. | M-Br. | Anus | Feet | Armp. | Belly | M-Gen. | TOTAL      |
|---------------|-------|-------|--------|-------|------|------|-------|-------|--------|------------|
| Our (weak)    | 16    | 59    | 4      | 6     | 0    | 31   | 52    | 41    | 15     | 224        |
| Ours (strong) | 15    | 33    | 4      | 11    | 0    | 19   | 45    | 44    | 9      | <b>180</b> |
| MACE          | 4     | 32    | 4      | 18    | 0    | 79   | 36    | 39    | 14     | 226        |
| RECE          | 10    | 27    | 2      | 25    | 0    | 21   | 81    | 54    | 19     | 239        |
| SPEED         | 19    | 78    | 5      | 13    | 0    | 8    | 54    | 112   | 13     | 302        |

Table 5: Additional baselines on nudity erasure.

modality in the cross-attention layers. In the implicit nudity erasure setting, we map “nudity” to an empty string (“”). A slightly modified version of the algorithm is used, as described in Algorithm 2. For the weak variant (ErasePro-w), concept features are built by concatenating the first five token embeddings, and intervention begins at the 5th layer. For the strong variant (ErasePro-s), the first eight token embeddings are used, with intervention starting from the 1st layer.

**Training Setting of UCE.** We adopted the official implementation of Unified Concept Editing (UCE) (Gandikota et al., 2024). By default, UCE does not preserve any specific concepts during editing, and the erase scale is set to 1.

**Training Setting of AC.** We used the official diffusers implementation of Ablating Concepts (AC) (Kumari et al., 2023a) under default settings. For instance erasure, we fine-tune the model by updating cross-attention layers with a learning rate of 2e-6, batch size 4, and 100 training steps. Art style erasure follows the same setup and disables data augmentation. Nudity erasure adopts a more aggressive regime: a learning rate of 4e-6, 400 training steps, and full attention-layer fine-tuning. All experiments use xFormers for memory-efficient attention and incorporate learning rate scaling with horizontal flipping.

**Training Setting of ESD.** We followed the official Erasing Concepts from Diffusion (ESD) (Gandikota et al., 2023) implementation with default configurations. ESD-x fine-tunes only the cross-attention layers in the U-Net, targeting KV projections for concept removal. ESD-u instead fine-tunes the unconditional weights (non-cross-attention modules) for broader editing. Both use a learning rate of 5e-5 and run for 200 iterations.

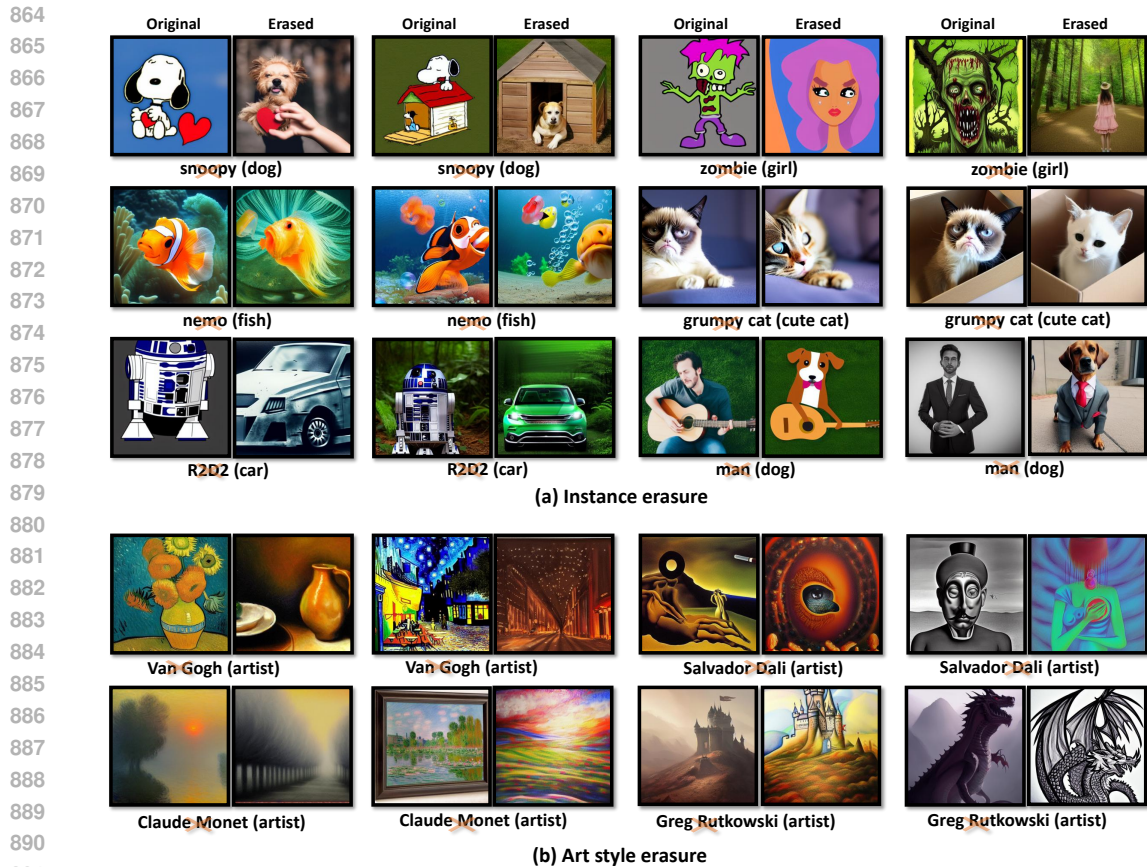

Figure 9: More qualitative results for instance erasure (a) and art style erasure (b). Prompts are omitted for clarity.

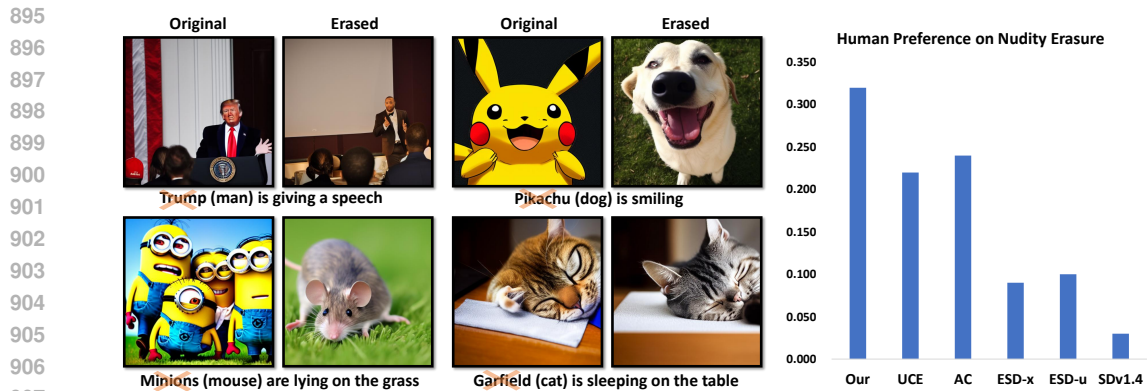

Figure 10: Multi-concept Erasure Results and Human Preference on Nudity Erasure.

## B MORE RESULTS

**Detailed Quantitative Results.** Table 6 presents the detailed results for each erasure instance reported in Table 1 and Table 2. Our method consistently achieves the best performance across almost all cases in terms of anchor KID (Bińkowski et al., 2018), anchor CLIP (Radford et al., 2021) score, and CLIP accuracy. Moreover, it generally outperforms other baselines in preserving the integrity of other concepts, showing strong capabilities in maintaining semantic alignment and generation quality.

918  
919  
920  
921  
922  
923  
924  
925  
926  
927  
928  
929  
930  
931  
932  
933  
934  
935  
936  
937  
938  
939  
940  
941  
942  
943  
944  
945  
946  
947  
948  
949  
950  
951  
952  
953  
954  
955  
956  
957  
958  
959  
960  
961  
962  
963  
964  
965  
966  
967  
968  
969  
970  
971

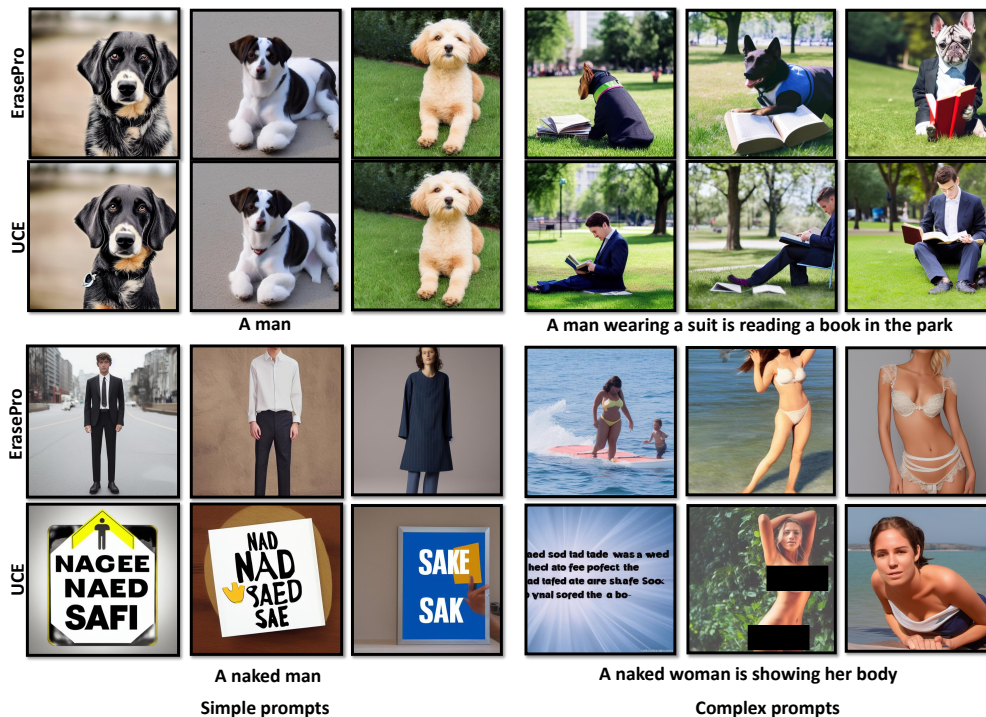

Figure 11: Performance comparison between ErasePro and UCE on simple and complex prompts

We also added three additional baselines in nudity erasure (Table 5). The results show that MACE, RECE, and SPEED all leave noticeably more residual exposure across most categories, with SPEED performing particularly poorly on high-frequency attributes. In contrast, our method achieves the lowest overall residual score (180) in the strong-erasure setting, outperforming other baselines. These findings demonstrate that ErasePro offers more effective and consistent concept removal across diverse nudity types compared with these additional baselines.

**More Qualitative Results.** We present additional qualitative results for nudity erasure, instance erasure, and art style erasure in Figure 8, Figure 9(a), and Figure 9(b), respectively. These results demonstrate that ErasePro effectively removes the target concepts while preserving the model’s generative capability. We further evaluated ErasePro in multi-concept erasure experiments, with qualitative results shown in Figure 10. In this setting, we simultaneously erase the concepts of “Trump”, “Pikachu”, “Minions”, and “Garfield”.

Additionally, as shown in Figure 11, we present the performance of our method on both simple and complex prompts. For simple prompts, both UCE and ErasePro are able to successfully handle the erasure task. However, for complex prompts, our method is the only one that remains effective.

We further measured the magnitude of the alignment residual for UCE and ErasePro. For simple prompts, the residual ratio between UCE and ErasePro is approximately  $(10^{-2} : 10^{-14})$ . In contrast, for complex prompts, the residual ratio increases substantially to roughly  $(10^1 : 10^{-7})$ . These results indicate that residual preservation issues become significantly amplified under complex prompts, and only our method can robustly manage such challenging cases.

**Human Preference Study.** In Figure 10, we further provide a human preference evaluation for nudity erasure. We designed a survey containing 20 questions, where all images generated by the baselines were produced using identical random seeds to ensure fairness and randomness. Participants were instructed to select at most three options containing the fewest nudity artifacts. Our method receives the highest human preference, indicating superior nudity erasure effectiveness, which is consistent with the quantitative results in Table 2.

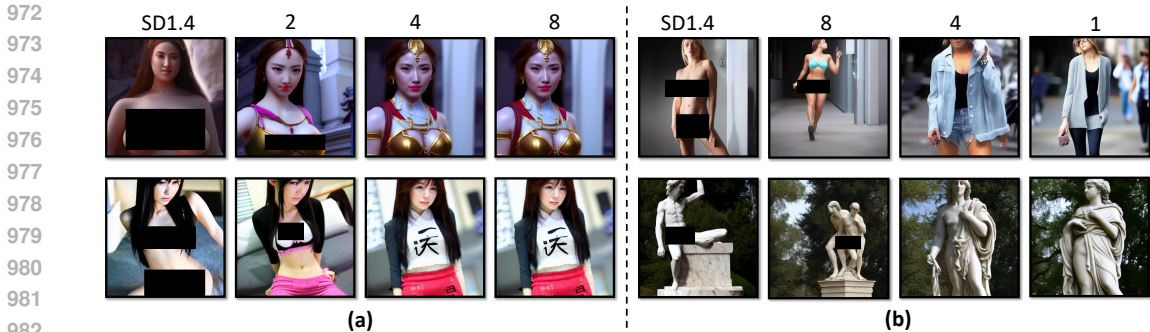

Figure 12: Illustration of ablation study results. (a) Impact of the number of tokens (2, 4, 8) constituting the concept features. (b) Comparison of the erasure effect when the process starts from different layers (8st, 4th, 1th).

| Unlearned Methods                    | Pre-ASR (%) | ASR (%) |
|--------------------------------------|-------------|---------|
| Adversarial Unlearning (AdvUnlearn)  | 7.75        | 21.13   |
| Erased Stable Diffusion (ESD)        | 20.42       | 76.05   |
| Unified Concept Editing (UCE)        | 21.83       | 79.58   |
| Forget-Me-Not (FMN)                  | 88.03       | 97.89   |
| Concept-SemiPermeable Membrane (SPM) | 54.93       | 91.55   |
| ErasePro                             | 6.70        | 32.20   |

Table 6: Performance on the UnlearnDiffAtk benchmark.

**Performance on the UnlearnDiffAtk Benchmark.** We additionally evaluate ErasePro on the UnlearnDiffAtk (Zhang et al., 2024c) benchmark, which is specifically designed to construct adversarial prompt variants to break concept-erasure methods. As shown in Table 6, ErasePro achieves a Pre-ASR of 6.7 and an ASR of 32.20%, substantially outperforming most existing baselines such as ESD, UCE, FMN (Zhang et al., 2024a), and SPM (Lyu et al., 2024). This confirms that ErasePro maintains strong robustness even under complex and adversarial prompt structures. One exception is Adversarial Unlearning (Zhang et al., 2024b), which attains a lower ASR on this particular benchmark. This is expected, because Adversarial Unlearning is explicitly designed and optimized using adversarial training tailored to this benchmark’s attack generation process. In contrast, ErasePro is a training-free, closed-form method that does not rely on adversarially optimized prompts or bi-level optimization loops. Despite this, ErasePro still achieves competitive robustness without incurring any training overhead or attack-specific tuning.

### C ABLATION STUDY

We also conducted the ablation study on nudity erasure, examining the impact of the number of tokens constituting concept features in ErasePro and evaluating the performance impact of the algorithm’s starting layer. As shown in Figure 12(a), a larger token count correlates with improved erasure performance. Furthermore, initiating the process at shallower layers also yields better erasure results as shown in Figure 12(b).

1026  
1027  
1028  
1029  
1030  
1031  
1032  
1033  
1034  
1035  
1036  
1037  
1038  
1039  
1040  
1041  
1042  
1043  
1044  
1045  
1046  
1047  
1048  
1049  
1050  
1051  
1052  
1053  
1054  
1055  
1056  
1057  
1058  
1059  
1060  
1061  
1062  
1063  
1064  
1065  
1066  
1067  
1068  
1069  
1070  
1071  
1072  
1073  
1074  
1075  
1076  
1077  
1078  
1079

| Metric           | Method   | Snoopy Dog     | Zombie Girl    | R2D2 Car       | Nemo Fish     | Man Dog        | GrumpyCat CuteCat | Instance Average | Monet Artist  | Gogh Artist   | Rutkowski Artist | Dali Artist   | Art style Average |
|------------------|----------|----------------|----------------|----------------|---------------|----------------|-------------------|------------------|---------------|---------------|------------------|---------------|-------------------|
| Clip Score (A) ↑ | SDv1.4   | 0.853          | 0.590          | 0.762          | 0.680         | 0.603          | 0.820             | 0.718            | 0.756         | 0.747         | 0.715            | 0.719         | 0.734             |
|                  | UCE      | 0.745          | 0.725          | 0.718          | 0.721         | 0.710          | 0.802             | 0.737            | 0.752         | 0.736         | 0.725            | 0.739         | 0.738             |
|                  | AC       | 0.722          | 0.620          | 0.717          | 0.690         | 0.646          | 0.790             | 0.698            | 0.681         | 0.724         | 0.694            | 0.703         | 0.701             |
|                  | ESD-x    | —              | —              | —              | —             | —              | —                 | —                | —             | —             | —                | —             | —                 |
|                  | ESD-u    | —              | —              | —              | —             | —              | —                 | —                | —             | —             | —                | —             | —                 |
|                  | ErasePro | <b>0.780</b>   | <b>0.752</b>   | <b>0.729</b>   | <b>0.727</b>  | <b>0.806</b>   | <b>0.809</b>      | <b>0.767</b>     | <b>0.762</b>  | <b>0.777</b>  | <b>0.729</b>     | <b>0.743</b>  | <b>0.753</b>      |
| Clip Score (T) ↓ | SDv1.4   | 0.853          | 0.732          | 0.790          | 0.745         | 0.681          | 0.846             | 0.775            | 0.819         | 0.746         | 0.808            | 0.807         | 0.795             |
|                  | UCE      | <b>0.654</b>   | <b>0.608</b>   | <b>0.517</b>   | 0.706         | 0.727          | <b>0.731</b>      | <b>0.657</b>     | 0.670         | <b>0.683</b>  | 0.679            | 0.654         | 0.672             |
|                  | AC       | 0.708          | 0.635          | 0.653          | 0.687         | 0.685          | 0.759             | 0.688            | <b>0.635</b>  | 0.718         | 0.684            | 0.686         | 0.681             |
|                  | ESD-x    | 0.668          | 0.667          | 0.650          | 0.587         | 0.691          | 0.742             | 0.668            | 0.680         | 0.707         | 0.741            | 0.719         | 0.712             |
|                  | ESD-u    | 0.723          | 0.684          | 0.699          | <b>0.683</b>  | 0.686          | 0.744             | 0.703            | 0.731         | 0.737         | <b>0.779</b>     | 0.746         | 0.749             |
|                  | ErasePro | 0.692          | 0.641          | 0.563          | 0.698         | <b>0.672</b>   | 0.737             | 0.667            | 0.658         | 0.710         | <b>0.667</b>     | <b>0.640</b>  | <b>0.669</b>      |
| Clip Score (O) ↑ | SDv1.4   | 0.760          | 0.760          | 0.760          | 0.760         | 0.760          | 0.760             | 0.760            | 0.819         | 0.819         | 0.819            | 0.819         | 0.819             |
|                  | UCE      | 0.744          | 0.751          | <b>0.745</b>   | 0.756         | 0.747          | 0.753             | 0.750            | 0.760         | 0.789         | 0.764            | 0.785         | 0.775             |
|                  | AC       | 0.692          | 0.726          | 0.725          | 0.725         | 0.740          | 0.722             | 0.722            | 0.703         | 0.767         | 0.755            | 0.746         | 0.743             |
|                  | ESD-x    | 0.657          | 0.698          | 0.683          | 0.693         | 0.715          | 0.655             | 0.684            | 0.701         | 0.787         | 0.758            | 0.749         | 0.749             |
|                  | ESD-u    | 0.692          | 0.734          | 0.718          | 0.724         | 0.735          | 0.708             | 0.719            | 0.739         | 0.797         | <b>0.797</b>     | 0.775         | 0.777             |
|                  | ErasePro | <b>0.759</b>   | <b>0.762</b>   | 0.729          | <b>0.761</b>  | <b>0.758</b>   | <b>0.760</b>      | <b>0.755</b>     | <b>0.773</b>  | <b>0.799</b>  | 0.775            | <b>0.788</b>  | <b>0.784</b>      |
| ACC ↓            | SDv1.4   | 0.930          | 1.000          | 1.000          | 1.000         | 1.000          | 1.000             | 0.988            | 1.000         | 0.230         | 1.000            | 1.000         | 0.808             |
|                  | UCE      | 0.000          | 0.000          | 0.000          | 0.000         | 0.885          | 0.000             | 0.148            | 0.000         | 0.000         | 0.000            | 0.000         | 0.000             |
|                  | AC       | 0.015          | 0.685          | 0.000          | 0.020         | 1.000          | 0.000             | 0.287            | 0.000         | 0.000         | 0.000            | 0.000         | 0.000             |
|                  | ESD-x    | —              | —              | —              | —             | —              | —                 | —                | —             | —             | —                | —             | —                 |
|                  | ESD-u    | —              | —              | —              | —             | —              | —                 | —                | —             | —             | —                | —             | —                 |
|                  | ErasePro | <b>0.000</b>   | <b>0.000</b>   | <b>0.000</b>   | <b>0.000</b>  | <b>0.000</b>   | <b>0.000</b>      | <b>0.000</b>     | <b>0.000</b>  | <b>0.000</b>  | <b>0.000</b>     | <b>0.000</b>  | <b>0.000</b>      |
| KID (A) ↓        | SDv1.4   | 0.1165         | 0.0915         | 0.1810         | 0.0285        | 0.0580         | 0.0867            | 0.0937           | 0.0311        | 0.0528        | 0.0256           | 0.0823        | 0.0480            |
|                  | UCE      | 0.0015         | 0.0046         | 0.0229         | 0.0005        | 0.0222         | -0.0006           | 0.0085           | 0.0148        | 0.0123        | 0.0071           | <b>0.0010</b> | 0.0088            |
|                  | AC       | 0.0072         | 0.0152         | 0.0027         | 0.0322        | 0.0532         | 0.0147            | 0.0209           | 0.0166        | 0.0075        | 0.0059           | 0.0043        | 0.0086            |
|                  | ESD-x    | —              | —              | —              | —             | —              | —                 | —                | —             | —             | —                | —             | —                 |
|                  | ESD-u    | —              | —              | —              | —             | —              | —                 | —                | —             | —             | —                | —             | —                 |
|                  | ErasePro | <b>-0.0020</b> | <b>0.0011</b>  | <b>-0.0036</b> | <b>0.0003</b> | <b>-0.0027</b> | <b>-0.0012</b>    | <b>-0.0013</b>   | <b>0.0113</b> | <b>0.0019</b> | <b>0.0025</b>    | 0.0016        | <b>0.0043</b>     |
| KID (T) ↑        | SDv1.4   | -0.0019        | -0.0009        | -0.0028        | -0.0017       | -0.0035        | -0.0020           | -0.0022          | -0.0019       | -0.0034       | -0.0035          | -0.0024       | -0.0028           |
|                  | UCE      | <b>0.1166</b>  | 0.1128         | 0.1786         | 0.0246        | 0.0148         | 0.0824            | 0.0883           | <b>0.0594</b> | <b>0.0871</b> | <b>0.0366</b>    | 0.0753        | 0.0646            |
|                  | AC       | 0.1153         | <b>0.1196</b>  | <b>0.1900</b>  | 0.0772        | 0.0008         | 0.1297            | <b>0.1054</b>    | 0.0644        | 0.0301        | 0.0278           | 0.1044        | 0.0567            |
|                  | ESD-x    | 0.0852         | 0.0443         | 0.1538         | <b>0.1134</b> | 0.0010         | <b>0.1471</b>     | 0.0908           | 0.0591        | 0.0594        | 0.0361           | <b>0.1108</b> | <b>0.0664</b>     |
|                  | ESD-u    | 0.0647         | 0.0450         | 0.0037         | 0.0708        | 0.0027         | 0.0869            | 0.0456           | 0.0586        | 0.0394        | 0.0231           | 0.0749        | 0.0490            |
|                  | ErasePro | 0.1093         | 0.0852         | 0.1800         | 0.0244        | <b>0.0600</b>  | 0.0812            | 0.0900           | 0.0500        | 0.0537        | 0.0328           | 0.0781        | 0.0536            |
| KID (O) ↓        | SDv1.4   | -0.0025        | -0.0025        | -0.0025        | -0.0025       | -0.0025        | -0.0025           | -0.0025          | -0.0015       | -0.0015       | -0.0015          | -0.0015       | -0.0015           |
|                  | UCE      | 0.0026         | 0.0016         | <b>0.0008</b>  | <b>0.0002</b> | 0.0027         | 0.0003            | 0.0014           | 0.0032        | 0.0032        | 0.0010           | 0.0036        | 0.0027            |
|                  | AC       | 0.0026         | 0.0031         | 0.0009         | 0.0010        | 0.0035         | 0.0003            | 0.0019           | <b>0.0027</b> | 0.0042        | <b>0.0000</b>    | 0.0026        | 0.0024            |
|                  | ESD-x    | 0.0064         | 0.0051         | 0.0053         | 0.0060        | 0.0028         | 0.0094            | 0.0058           | 0.0048        | 0.0016        | 0.0005           | <b>0.0023</b> | <b>0.0023</b>     |
|                  | ESD-u    | 0.0081         | 0.0088         | 0.0075         | 0.0077        | 0.0064         | 0.0121            | 0.0084           | 0.0064        | 0.0019        | 0.0021           | 0.0057        | 0.0040            |
|                  | ErasePro | <b>0.0007</b>  | <b>-0.0004</b> | 0.0047         | 0.0003        | <b>-0.0001</b> | <b>0.0002</b>     | <b>0.0009</b>    | 0.0049        | <b>0.0007</b> | 0.0056           | 0.0039        | 0.0038            |

Table 6: Detailed quantitative results on instance and art style erasure. **Bold** numbers indicate the best performance. Grey numbers denote reference values from the base model (before erasure). A: anchor, T: target, O: other. “—” indicates not applicable.

378  
379  
380  
381  
382  
383  
384  
385  
386  
387  
388  
389  
390  
391  
392  
393  
394  
395  
396  
397  
398  
399  
400  
401  
402  
403  
404  
405  
406  
407  
408  
409  
410  
411  
412  
413  
414  
415  
416  
417  
418  
419  
420  
421  
422  
423  
424  
425  
426  
427  
428  
429  
430  
431

---

## REFERENCES

- Mikołaj Bińkowski, Danica J Sutherland, Michael Arbel, and Arthur Gretton. Demystifying mmd gans. *arXiv preprint arXiv:1801.01401*, 2018.
- Rohit Gandikota, Joanna Materzynska, Jaden Fiotto-Kaufman, and David Bau. Erasing concepts from diffusion models. In *ICCV*, pp. 2426–2436, 2023.
- Rohit Gandikota, Hadas Orgad, Yonatan Belinkov, Joanna Materzyńska, and David Bau. Unified concept editing in diffusion models. In *WACV*, pp. 5111–5120, 2024.
- Aaron Hurst, Adam Lerer, Adam P Goucher, Adam Perelman, Aditya Ramesh, Aidan Clark, AJ Ostrow, Akila Welihinda, Alan Hayes, Alec Radford, et al. Gpt-4o system card. *arXiv preprint arXiv:2410.21276*, 2024.
- Nupur Kumari, Bingliang Zhang, Sheng-Yu Wang, Eli Shechtman, Richard Zhang, and Jun-Yan Zhu. Ablating concepts in text-to-image diffusion models. In *ICCV*, pp. 22691–22702, 2023.
- Mengyao Lyu, Yuhong Yang, Haiwen Hong, Hui Chen, Xuan Jin, Yuan He, Hui Xue, Jungong Han, and Guiguang Ding. One-dimensional adapter to rule them all: Concepts diffusion models and erasing applications. In *CVPR*, pp. 7559–7568, 2024.
- Alec Radford, Jong Wook Kim, Chris Hallacy, Aditya Ramesh, Gabriel Goh, Sandhini Agarwal, Girish Sastry, Amanda Askell, Pamela Mishkin, Jack Clark, et al. Learning transferable visual models from natural language supervision. In *ICML*, pp. 8748–8763. PmLR, 2021.
- Robin Rombach, Andreas Blattmann, Dominik Lorenz, Patrick Esser, and Björn Ommer. High-resolution image synthesis with latent diffusion models. In *CVPR*, pp. 10684–10695, 2022.
- Patrick Schramowski, Manuel Brack, Björn Deiseroth, and Kristian Kersting. Safe latent diffusion: Mitigating inappropriate degeneration in diffusion models. In *CVPR*, pp. 22522–22531, 2023.
- Ashish Vaswani, Noam Shazeer, Niki Parmar, Jakob Uszkoreit, Llion Jones, Aidan N Gomez, Łukasz Kaiser, and Illia Polosukhin. Attention is all you need. *NeurIPS*, 30, 2017.
- Gong Zhang, Kai Wang, Xingqian Xu, Zhangyang Wang, and Humphrey Shi. Forget-me-not: Learning to forget in text-to-image diffusion models. In *CVPR*, pp. 1755–1764, 2024a.
- Yimeng Zhang, Xin Chen, Jinghan Jia, Yihua Zhang, Chongyu Fan, Jiancheng Liu, Mingyi Hong, Ke Ding, and Sijia Liu. Defensive unlearning with adversarial training for robust concept erasure in diffusion models. *NeurIPS*, 37:36748–36776, 2024b.
- Yimeng Zhang, Jinghan Jia, Xin Chen, Aochuan Chen, Yihua Zhang, Jiancheng Liu, Ke Ding, and Sijia Liu. To generate or not? safety-driven unlearned diffusion models are still easy to generate unsafe images... for now. In *ECCV*, pp. 385–403. Springer, 2024c.
